# Supplementary material for: Platelet proteomic profiling reveals potential mediators of immunothrombosis and proteostasis in myeloproliferative neoplasms
Source: PubMed Central journal article supplement — Blood Adv. 2024 Jun 13;8(16):4276–80. doi: 10.1182/bloodadvances.2023012016 (PMC11372589; doi:10.1182/bloodadvances.2023012016), 2024-06-13
Supplement: BLOODA_ADV-2023-012016-mmc1.pdf [file BLOODA_ADV-2023-012016-mmc1.pdf]

1 **Platelet proteomic profiling reveals potential mediators of**  
2 **immunothrombosis and proteostasis in patients with**  
3 **myeloproliferative neoplasms**  
4  
5

6 List of Supplementary Material:

- 7 - Methods
  - 8 - Tables S1-S2 and legends
  - 9 - Table S3-S13 legends
  - 10 - Figure S1-S2 and legends
- 11  
12  
13

14 **Methods**  
15

16 **Study recruitment and sample preparation for platelet proteomics**

17 Ethical approval was granted from the Institutional Review Board (IRB) of Papa Giovanni  
18 XXIII Hospital, Bergamo, Italy (IRB approval number 1789/2013) and the Mater  
19 Misericordiae University Hospital, Dublin, Ireland (IRB approval number 1/378/2241).

20 Patients over the age of 18 with an established diagnosis of MPN (PV n= 41, ET n= 59)  
21 according to the World Health Organization classification criteria (in situ at time of  
22 diagnosis)<sup>1, 2, 3</sup> were invited to participate at their routine haematological follow-up (2014-  
23 2022). A control group of healthy donors (n= 40) were recruited from the same clinical sites  
24 and consisted of volunteers (predominantly hospital staff) over the age of 40, with no recent  
25 history of illness, no chronic inflammatory/medical conditions and not taking antiplatelet or  
26 anticoagulant therapy. Full blood count was assessed at the time of blood draw. Controls  
27 were not routinely screened for MPN driver mutations. Following informed consent, samples  
28 of whole blood collected in sodium citrate (0.105mol/L) were obtained by direct  
29 venipuncture. Platelets were isolated from platelet rich plasma (PRP) obtained by  
30 centrifugation of whole blood for 10 minutes at 400 g at room temperature (RT), according to  
31 an established previously published method<sup>4</sup>. Briefly, PRP was diluted in 1:2 ratio  
32 with Krebs Ringer buffer (4mM KCl, 107 mM NaCl, 20 mM NaHCO<sub>3</sub>, 2mM Na<sub>2</sub>SO<sub>4</sub>, pH 5).  
33 After centrifugation at 1,000 g for 10 min at RT, the platelet pellet was resuspended

34 in Krebs Ringer buffer supplemented with glucose (0.9 g/L, PH 6) and centrifuged a second  
35 time (1,000 g, 10 min, RT). This washing procedure was repeated twice, and the platelets  
36 were resuspended at a concentration of  $1 \times 10^9$  platelets/mL in phosphate buffered saline  
37 (PBS) or PBS containing 1% Triton, snap frozen on dry ice and stored at -80 °C.

38

### 39 **Mass Spectrometry**

40 Platelets were lysed in RIPA buffer (100 mM Tris pH 8.0, 300 mM NaCl, 2% Triton-X 100,  
41 0.2% SDS, 1% sodium deoxycholate) with protease and phosphatase inhibitors (Roche).  
42 Samples were precipitated with 95% acetone overnight at -20 °C, centrifuged at 14,000 g at  
43 4 °C for 10 minutes and the supernatant was removed. The protein pellet was resuspended  
44 in PBS and protein concentration was estimated by measuring absorbance at 280nm using a  
45 DS-11 spectrophotometer (DeNovix) as before<sup>5, 6</sup>. Mass spectrometry sample preparation  
46 was performed using the commercially available PreOmics iST HT 192x kit (P.O.00067). In  
47 brief, 50 µg of protein was simultaneously lysed, reduced, and alkylated for 10 min at 95 °C  
48 and 1000 rpm, transferred to a cartridge and subsequently double-digested with LysC and  
49 trypsin at 37 °C and 500 rpm for 1 hour. Peptides were purified with repeated washes and  
50 eluted. Samples were evaporated at 45 °C and peptides resuspended in LC-load buffer.  
51 Digested peptides were loaded onto C18 trap columns (EvoTip) and washed with 20 µL 0.1%  
52 formic acid (FA) followed by the addition of 100 µL storage solvent (0.1% FA). Differential  
53 proteomic signatures were established using liquid chromatography mass spectrometry (LC-  
54 MS) with a Bruker TimsTOF mass spectrometer connected to an EvoSep liquid  
55 chromatography system operated by the UCD Conway Proteomics Core facility.

56

57 Samples were loaded onto the Evosep One LC system and separated with an increasing  
58 acetonitrile gradient over 40 minutes at a flow rate of 250 nl/min at room temperature. The  
59 mass spectrometer was operated in positive ion mode with a capillary voltage of 1500V, dry  
60 gas flow of 3 l/min and a dry temperature of 180 °C. All data was acquired with the

61 instrument operating in trapped ion mobility spectrometry (TIMS) mode. Trapped ions were  
62 selected for MS/MS using parallel accumulation serial fragmentation (PASEF).

63

64 Identified peptides from platelet samples were searched against a human FASTA (July  
65 2022) using MaxQuant (2.0.3.0) with specific parameters for trapped ion mobility spectra  
66 data dependent acquisition (TIMS DDA). In the main Andromeda search precursor, mass  
67 and fragment mass had an initial mass tolerance of 6 ppm and 20 ppm, respectively. The  
68 search included fixed modification of carbamidomethyl cysteine. Minimal peptide length was  
69 set to seven amino acids, and a maximum of two miscleavages was allowed. The false  
70 discovery rate (FDR) was set to 0.01 for peptide and protein identifications. The normalized  
71 protein intensity of each identified protein was used for label free quantitation (LFQ) as  
72 previously described<sup>7</sup>.

73

#### 74 **Data analyses**

75 Continuous data were summarized as medians and IQRs and categorical data are  
76 presented as frequencies and percentages. To compare differences in clinical variables  
77 between healthy controls and MPN subtypes (ET and PV), we used violin and box plots and  
78 conducted Mann-Whitney *U* test for non-parametric data. For unsupervised clustering and  
79 visualization, we performed principal component analyses (identifying MPN subtypes by  
80 color). All analyses were performed using the R studio interface (version 2023.03.1+446).  
81 Statistical analysis of the LFQ intensities was performed using Perseus (version 2.0.10) and  
82 R (version 4.3.1). Protein identifications were filtered to eliminate identifications from the  
83 reverse database, proteins only identified by site, and common contaminants. For  
84 downstream analysis, only proteins identified in at least 50% of samples in at least one  
85 group (control/ET/PV) were included. Missing values were imputed using the random forest  
86 method (Missforest package, R/Bioconductor). Data was log<sub>2</sub>-transformed and differential  
87 protein expression was established using the Limma software package within  
88 R/Bioconductor.

89

90 Differential protein expression was adjusted for batch, patient age, sex, and treatment  
91 (antiplatelet and cytoreductive therapy) as potential confounding variables within the linear  
92 model in Limma (design <-  
93 model.matrix(~patientvar\$Subtype+patientvar\$Batch+patientvar\$Age+patientvar\$Sex+patie  
94 ntvar\$ASAnum+patientvar\$HYDnum). Controlling for multiple comparisons was performed  
95 using the Benjamini-Hochberg defined false discovery rate (FDR). Significant differential  
96 protein expression was pre-specified as proteins with an FDR < 0.05 and a fold change of  
97 1.5 in MPN, as compared to healthy controls.

98

99 A heatmap of the top 10 differentially expressed proteins (based on fold change and FDR  
100 <0.01) was generated using the pheatmap R package, and its built-in functions for  
101 hierarchical cluster analysis on the sample-to-sample Euclidean distance matrix of the  
102 expression data.

103

104

### 105 **Proteomic quality control and validation analysis**

106 To assess intra-donor platelet proteomic reproducibility, 6 patient samples were analyzed as  
107 technical replicates (5 in duplicate, 1 in triplicate). Pearson correlation coefficient ( $r$ ) was  
108 performed on the log<sub>2</sub> transformed LFQ- intensity of all proteins quantified (n= 1771) across  
109 technical replicate samples (**Figure S1**). To assess biological (inter-donor) variability in  
110 protein abundances, Pearson correlation coefficient ( $r$ ) was performed on the log<sub>2</sub>  
111 transformed LFQ-intensity of all proteins quantified (n= 1952) across biologic replicate  
112 samples (control n= 40; MPN n= 100) (**Figure S2, Tables S12 & S13**).

113

### 114 **Pathway/Gene set enrichment analysis for differentially expressed (DE) proteins.**

115 Gene set enrichment analysis (GSEA)<sup>8</sup>, a well-established method for determining  
116 regulatory patterns in co-expressed genes, was performed on the entire DE protein set for

117 each MPN subtype (PV & ET), using the Cancer Hallmarks gene sets from MSigDB<sup>9</sup>. The  
 118 'GSEA Pre-ranked' function was used with a metric score that combines fold change and  
 119 adjusted p-value together for improved gene ranking. We used default settings with 1,000  
 120 gene set permutations to generate *p* and *q* values and compared MPN subtypes. In these  
 121 analyses, to allow for a broad comparison, we assessed all proteins that were differentially  
 122 expressed according to FDR/adjusted *p* < 0.25 as recommended by the authors of GSEA<sup>8</sup>.

123  
 124  
 125

## 126 Supplementary Tables

127 **Table S1: Characteristics of MPN Patients & Controls**  
 128  
 129

|                                                                                  | <b>ET</b>         | <b>PV</b>         | <b>Control</b>  |
|----------------------------------------------------------------------------------|-------------------|-------------------|-----------------|
| <b>Subject Count, n</b>                                                          | 59                | 41                | 40              |
| <b>Sample Count, n</b>                                                           | 59                | 41                | 40              |
| <b>Median age, y (range)</b>                                                     | 61 (32-86)        | 63 (38-83)        | 45 (24-61)      |
| <b>Female, n (%)</b>                                                             | 32 (54)           | 22 (54)           | 24 (60)         |
| <b>Platelet count (X10<sup>9</sup>/L), median (25% quartile, 75% quartile)</b>   | 540 (422, 778)    | 465 (318, 638)    | 244 (220, 265)  |
| <b>White cell count (X10<sup>9</sup>/L), median (25% quartile, 75% quartile)</b> | 6.9 (6, 8.1)      | 8.9 (7.6, 11.2)   | 6.5 (5.2, 8.4)  |
| <b>Hemoglobin (g/dL), median (25% quartile, 75% quartile)</b>                    | 14.1 (13.4, 15.3) | 14.5 (13.4, 15.4) | 14 (13.2, 14.4) |
| <b>Hematocrit (%), median (25% quartile, 75% quartile)</b>                       | 41.7 (40.3, 45.1) | 44.3 (42.2, 46.9) | 40 (37, 43)     |
| <b>History of arterial thrombosis, n (%)</b>                                     | 5 (8.5)           | 6 (14.6)          | 0 (0)           |
| <b>History of venous thromboembolism, n (%)</b>                                  | 2 (3.4)           | 1 (2.4)           | 0 (0)           |
| <b>Median time from diagnosis, y (range)</b>                                     | 7 (1-31)          | 4 (1-30)          | NA              |
| <b>MPN driver mutation, n (%)</b>                                                |                   |                   |                 |
| <i>JAK2</i> V617F                                                                | 26 (44)           | 41 (100)          | 0 (0)           |
| <i>CALR</i>                                                                      | 18 (31)           | 0 (0)             | 0 (0)           |
| <i>MPL</i>                                                                       | 2 (3)             | 0 (0)             | 0 (0)           |
| Triple Negative                                                                  | 12 (21)           | 0 (0)             | 0 (0)           |
| Missing                                                                          | 1 (1)             | 0 (0)             | 0 (0)           |
| <b>Therapy, n (%)</b>                                                            |                   |                   |                 |
| <b>Aspirin &amp; hydroxyurea</b>                                                 | 27 (46)           | 28 (68)           | 0 (0)           |
| Aspirin only                                                                     | 20 (34)           | 12 (30)           | 0 (0)           |
| Hydroxyurea only                                                                 | 4 (7)             | 0 (0)             | 0 (0)           |
| JAK inhibitor                                                                    | 0 (0)             | 0 (0)             | 0 (0)           |
| No treatment                                                                     | 8 (13)            | 1 (2)             | 40 (100)        |

|  |  |  |  |
|--|--|--|--|
|  |  |  |  |
|--|--|--|--|

130

131

132

133

134

**Table S1:** MPN patient and healthy control characteristics recruited across two sites (Papa Giovanni XXIII Hospital, Bergamo, Italy and Mater Misericordiae University Hospital, Dublin, Ireland) for proteomic analysis.

135

**Table S2**

| Candidate protein (Gene name) | Platelet expression by MPN subtype<br>Absolute fold change (direction of change) | Cellular function and relationship to procoagulant, proinflammatory, and profibrotic pathways in other published work.                                                                                                                                                                                                                                                           |
|-------------------------------|----------------------------------------------------------------------------------|----------------------------------------------------------------------------------------------------------------------------------------------------------------------------------------------------------------------------------------------------------------------------------------------------------------------------------------------------------------------------------|
| <b>MMP1</b>                   | <b>PV:</b> 4.5 (increased)<br><b>ET:</b> 5.2 (increased)                         | MMP1, an interstitial collagenase, is known to cleave protease-activated receptor 1 (PAR1) and promote platelet activation and regulate thrombogenesis in vitro <sup>10, 11, 12</sup> . Furthermore, MMP1 mediates tumor invasion by compromising vascular barrier integrity and has been associated with inferior prognosis in solid organ malignancies <sup>13, 14, 15</sup> . |
| <b>FcyRIIA</b>                | <b>PV:</b> 2 (increased)<br><b>ET:</b> 2 (increased)                             | Unbalanced FcyRIIA-mediated platelet aggregation was previously reported to promote thrombosis <sup>16</sup> .                                                                                                                                                                                                                                                                   |
| <b>SERPINH1</b>               | <b>PV:</b> 2 (increased)                                                         | There is evidence of decreased expression or ablation of this collagen binding, platelet adhesion protein in immobilized mammals as a thromboprotective mechanism <sup>17, 18, 19</sup> .                                                                                                                                                                                        |
| <b>LGALS1</b>                 | <b>PV:</b> 6.7 (increased)<br><b>ET:</b> 4.7 (increased)                         | Galactin-1 is a beta-galactosidase binding protein which is reported to promote tumour cell proliferation and survival in haematological malignancies <sup>20</sup> . Recent data delineates the contribution of galactin-1 to disease severity in myelofibrosis and identified the protein as a potential drug target with disease modifying effects <sup>21</sup> .            |
| <b>S100A6</b>                 | <b>ET:</b> 2 (increased)                                                         | The S100 family of proteins is a major player in hematopoietic proliferation and recent work has identified proinflammatory/profibrotic roles for S100A6, S100A8, S100A9 in bone marrow, granulocytes, and plasma in MPN <sup>21, 22, 23, 24, 25, 26</sup> .                                                                                                                     |
| <b>PDIA6</b>                  | <b>PV:</b> 1.7 (increased)                                                       | Protein disulfide isomerases (PDIs) are key mediators of platelet ER homeostasis and the relationship between PDIs, ER & oxidative stress, platelet activation and thrombosis has recently been elucidated <sup>27, 28</sup> .                                                                                                                                                   |
| <b>HPSE</b>                   | <b>PV:</b> 1.8 (increased)                                                       | Heparanase cleaves heparan sulfate proteoglycans and participates in extracellular matrix remodeling. It has been shown to be increased in the plasma extracellular vesicles of patients with PV <sup>29</sup> .                                                                                                                                                                 |

|                 |                                                           |                                                                                                                                                                                                                                                                                                                                                                                                                                               |
|-----------------|-----------------------------------------------------------|-----------------------------------------------------------------------------------------------------------------------------------------------------------------------------------------------------------------------------------------------------------------------------------------------------------------------------------------------------------------------------------------------------------------------------------------------|
| <b>DIAPH1</b>   | <b>PV:</b> 1.9 (increased)<br><b>ET:</b> 1.8 (increased)  | We find increased expression of protein diaphanous homolog-1 (DIAPH1) possibly suggesting altered megakaryopoiesis in peripherally circulating platelets in PV and ET. DIAPH regulates proplatelet formation via Rho-mediated actin polymerization and microtubule assembly <sup>30</sup> .                                                                                                                                                   |
| <b>RAB4A</b>    | <b>PV:</b> 3.7 (increased)<br><b>ET:</b> 2.3 (increased)  | A Ras GTPase signaling protein which regulates platelet alpha granule release <sup>31</sup> .                                                                                                                                                                                                                                                                                                                                                 |
| <b>CD63</b>     | <b>PV:</b> 2.6 (decreased)                                | Downregulation of CD63 has been associated with proliferation and metastasis in solid organ malignancy regulated by IL-6, IL-27 and STAT3 signaling <sup>32</sup> .                                                                                                                                                                                                                                                                           |
| <b>CTSC</b>     | <b>PV:</b> 2 (increased)                                  | Abundant Cathepsin C drives inflammation through macrophage activation via NF-κB signaling pathway <sup>33</sup> .                                                                                                                                                                                                                                                                                                                            |
| <b>VAMP8</b>    | <b>ET:</b> 1.7 (increased)                                | VAMP8 regulates platelet granule secretion and thrombosis <i>in vivo</i> <sup>34</sup> .                                                                                                                                                                                                                                                                                                                                                      |
| <b>EIF4G1</b>   | <b>PV:</b> 2.1 (increased)<br><b>ET:</b> 1.74 (increased) | EIF4G1 has been identified as a prognostic biomarker in breast cancer <sup>35</sup> .                                                                                                                                                                                                                                                                                                                                                         |
| <b>HSP90AB1</b> | <b>ET:</b> 1.5 (increased)                                | We find increased expression of heat shock proteins in ET (HSP90AB1, TRAP1) and PV (HYOU1, HSPH1, DNAJA2). Heat shock protein 70 kDa and heat shock protein 90 kDa are two families of chaperone networks with integral roles in protein folding, degradation, trafficking, and maturation. They are known to promote oncogenesis by protecting a spectrum of cancer related proteins <sup>36, 37, 38</sup> .                                 |
| <b>SLC25A2</b>  | <b>PV:</b> 1.9 (decreased)                                | SLC25A2 is decreased in PV (with SLC2A3 and SLC44A1 differentially expressed in ET). Solute membrane carrier proteins have been associated with venous thromboembolism in genome wide association studies and <i>in vivo</i> models <sup>39, 40</sup> .                                                                                                                                                                                       |
| <b>RAB32</b>    | <b>PV:</b> 2.1 (increased)<br><b>ET:</b> 1.6 (increased)  | RAB32 is increased in ET (along with mitochondrial membrane protein TOMM22). Mitochondria are recognized as key regulators of platelet procoagulant function <sup>41</sup> . Loss of mitochondrial protein RAB32 is associated with dense granule storage pool disease Hermansky-Pudlak syndrome <sup>42</sup> .                                                                                                                              |
| <b>PSMD11</b>   | <b>PV:</b> 2 (increased)<br><b>ET:</b> 1.7 (increased)    | We show evidence of dysregulated protein degradation pathways with upregulation of PSMD11 along with differential expression of lysosomal proteins (SORT1 and ATP6V) and other proteasomal subunits. This reflects the work of other groups who have shown that protein quality-control pathways may be important in the pathogenesis of MPN and other prothrombotic diseases and represent novel therapeutic targets <sup>43, 44, 45</sup> . |

137 **Table S2:** Select/representative candidate proteins that may variably influence the  
138 proinflammatory, pro-thrombotic, and profibrotic processes in MPNs. Fold change reflects  
139 relative quantification in MPN subtypes compared to healthy controls.

140  
141 **Table S3:** 1952 proteins were quantified (LFQ intensity, see Methods) across PV, ET, and  
142 control platelet lysate samples.

143  
144 **Table S4:** 1315 proteins taken forward for downstream analysis. Proteins filtered to remove  
145 contaminants, proteins identified by site only, or in reverse. Proteins included were quantified  
146 across all groups (PV, ET, and control) and were present in at least 50% of samples in at  
147 least one group (see Methods).

148  
149 **Table S5:** Full list of 227 differentially expressed platelet proteins (Benjamini Hochberg false  
150 discovery rate <0.05) identified between ET and control samples.

151  
152 **Table S6:** Full list of 166 differentially expressed platelet proteins (Benjamini Hochberg false  
153 discovery rate <0.05) identified between PV and control samples.

154  
155 **Table S7:** Full list of 178 differentially expressed platelet proteins (Benjamini Hochberg false  
156 discovery rate <0.05) identified between PV and *JAK2* V617F positive ET samples.

157  
158 **Table S8:** No significantly differentially expressed platelet proteins (Benjamini Hochberg  
159 false discovery rate <0.05) identified between *JAK2* V617F and *CALR* positive ET patients.

160  
161 **Table S9:** Full list of 90 differentially expressed platelet proteins (Benjamini Hochberg false  
162 discovery rate <0.05) identified between triple-negative and mutation positive ET samples.

163  
164 **Table S10:** Full data for all molecular pathways identified in platelet proteome of ET patient  
165 cohorts.

166  
167 **Table S11:** Full data for all molecular pathways identified in platelet proteome of PV patient  
168 cohorts.

169  
170 **Table S12:** Correlation matrix with Pearson correlation coefficient ( $r$ ) of log<sub>2</sub> transformed  
171 LFQ intensity from biologic replicates of control (n= 40) samples.

172  
173 **Table S13:** Correlation matrix with Pearson correlation coefficient ( $r$ ) of log<sub>2</sub> transformed  
174 LFQ intensity from biologic replicates of MPN (PV n= 41; ET n= 59) samples.

175

176

177

178

179

180

181 **Supplementary Figures**



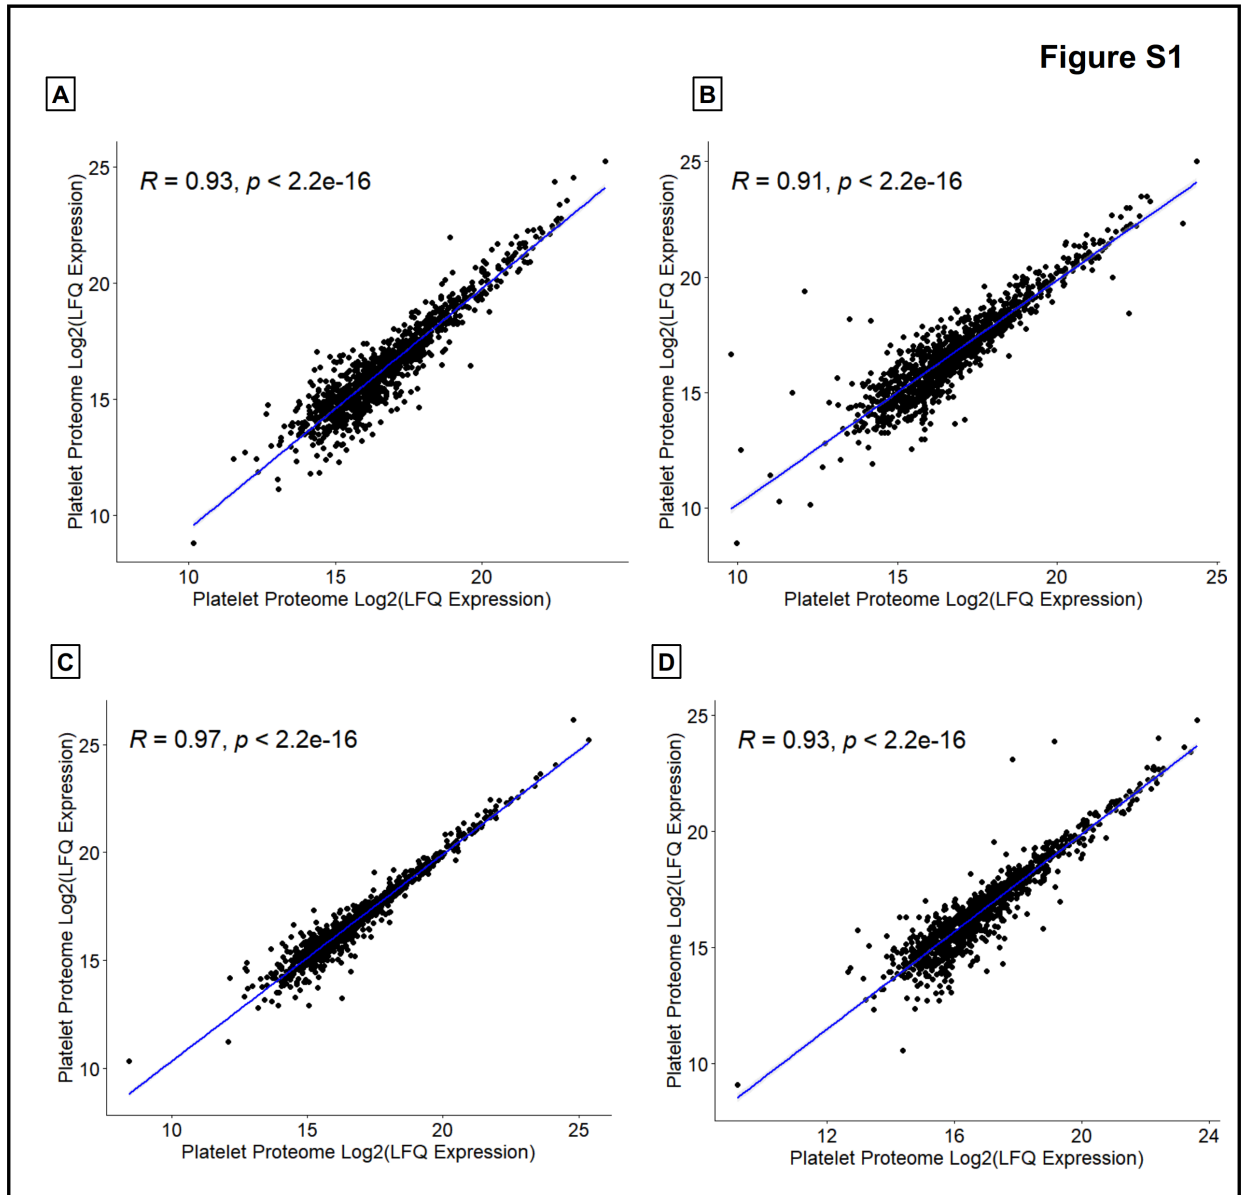

182  
183

184 **Figure S1: Strong correlation between platelet proteome technical replicates.**

185 Pearson correlation coefficients (*r*) from representative samples (A-D) demonstrate intra-  
186 donor reproducibility with strong correlation of log transformed LFQ intensities from technical  
187 replicates of the platelet proteome.

188

189

190

191

192

193

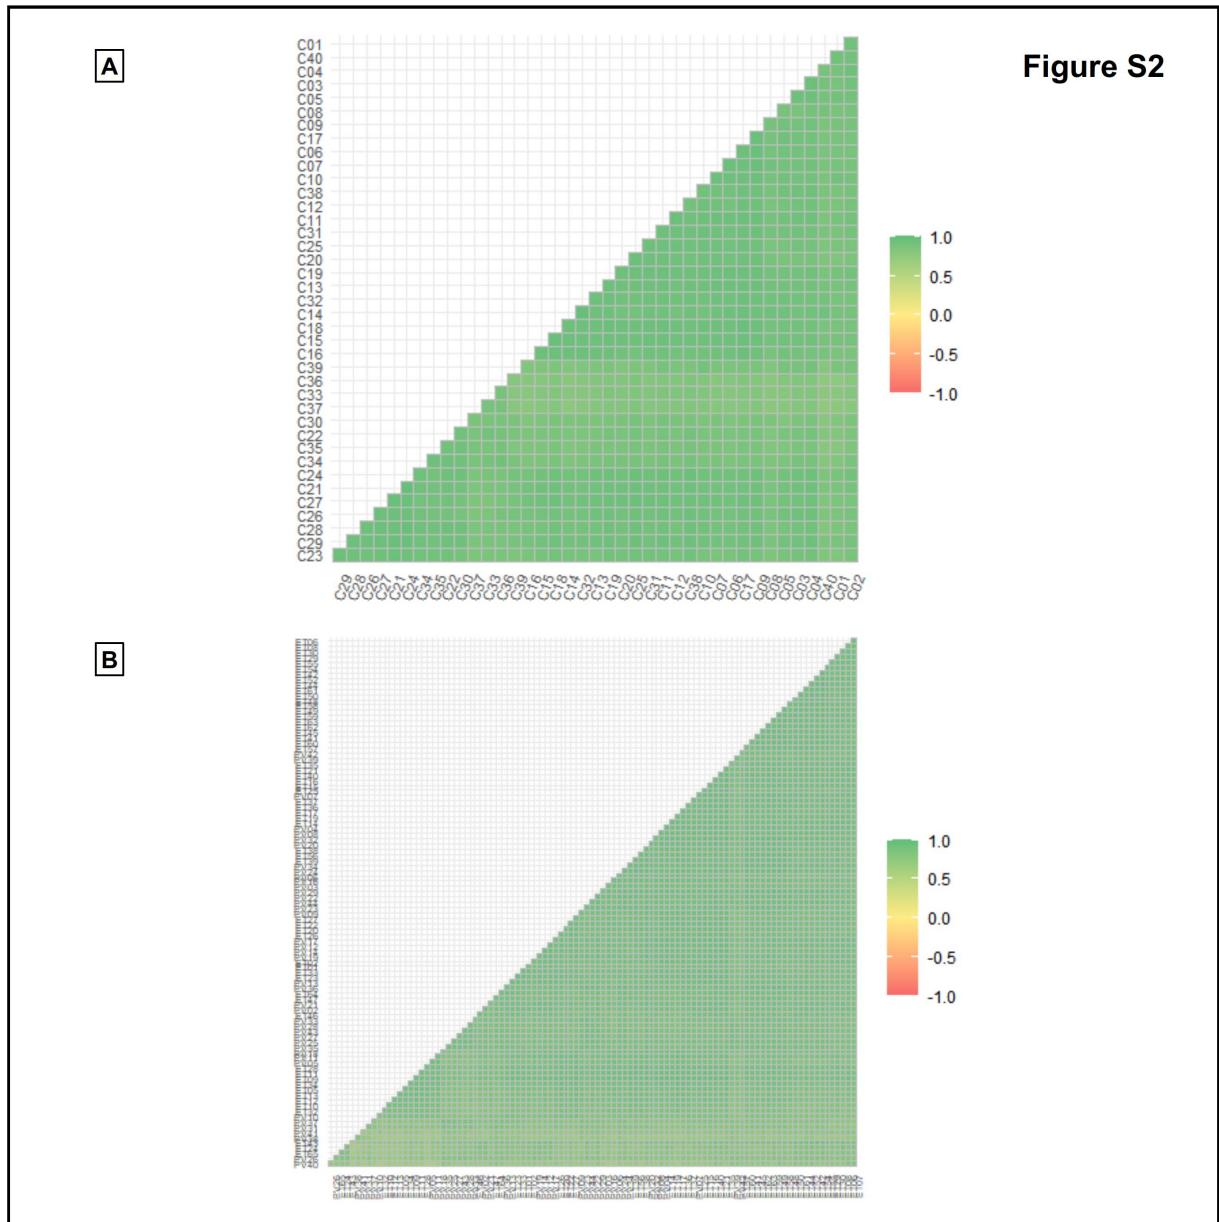

194  
195

196

197 **Figure S2: Strong correlation between platelet proteome biologic replicates**

198 Correlation matrix of Pearson correlation coefficients ( $r$ ) from biologic replicates show  
 199 uniformly strong inter-donor reproducibility of the LFQ-proteomic analysis between biologic  
 200 replicates from **(A)** controls (average  $r = 0.90 \pm 0.04$ , min  $r = 0.75$ , max  $r = 0.97$ ) and **(B)**  
 201 MPN (average  $r = 0.88 \pm 0.06$ , min  $r = 0.57$ , max  $r = 0.98$ ) patient samples.

202

203

204

205

206  
207  
208  
209  
210  
211  
212  
213  
214  
215  
216  
217  
218  
219  
220  
221  
222  
223  
224  
225  
226  
227  
228  
229  
230  
231  
232  
233  
234  
235  
236  
237  
238  
239  
240  
241  
242  
243  
244  
245  
246  
247  
248  
249  
250  
251  
252  
253  
254

## Bibliography

1. Jaffe E S. World Health Organization Classification of Tumours. Pathology & Genetics. Tumours of Hematopoietic and Lymphoid Tissues. IARC Press, Lyon. 2001.
2. Tefferi A, Vardiman JW. Classification and diagnosis of myeloproliferative neoplasms: the 2008 World Health Organization criteria and point-of-care diagnostic algorithms. *Leukemia*. 2008;22(1):14-22.
3. Arber DA, Orazi A, Hasserjian R, Thiele J, Borowitz MJ, Le Beau MM, et al. The 2016 revision to the World Health Organization classification of myeloid neoplasms and acute leukemia. *Blood*. 2016;127(20):2391-405.
4. Cortelazzo S, Marchetti M, Orlando E, Falanga A, Barbui T, Buchanan MR. Aspirin increases the bleeding side effects in essential thrombocythemia independent of the cyclooxygenase pathway: role of the lipoxigenase pathway. *Am J Hematol*. 1998;57(4):277-82.
5. Parsons MEM, Szklanna PB, Guerrero JA, Wynne K, Dervin F, O'Connell K, et al. Platelet Releasate Proteome Profiling Reveals a Core Set of Proteins with Low Variance between Healthy Adults. *Proteomics*. 2018;18(15):e1800219.
6. Szklanna PB, Parsons ME, Wynne K, O'Connor H, Egan K, Allen S, et al. The Platelet Releasate is Altered in Human Pregnancy. *Proteomics Clin Appl*. 2019;13(3):e1800162.
7. Weiss L, Keaney J, Szklanna PB, Prendiville T, Uhrig W, Wynne K, et al. Nonvalvular atrial fibrillation patients anticoagulated with rivaroxaban compared with warfarin exhibit reduced circulating extracellular vesicles with attenuated pro-inflammatory protein signatures. *J Thromb Haemost*. 2021;19(10):2583-95.
8. Subramanian A, Tamayo P, Mootha VK, Mukherjee S, Ebert BL, Gillette MA, et al. Gene set enrichment analysis: a knowledge-based approach for interpreting genome-wide expression profiles. *Proc Natl Acad Sci U S A*. 2005;102(43):15545-50.
9. Liberzon A, Birger C, Thorvaldsdóttir H, Ghandi M, Mesirov JP, Tamayo P. The Molecular Signatures Database (MSigDB) hallmark gene set collection. *Cell Syst*. 2015;1(6):417-25.
10. Austin KM, Covic L, Kuliopulos A. Matrix metalloproteases and PAR1 activation. *Blood*. 2013;121(3):431-9.
11. Trivedi V, Boire A, Tchernychev B, Kaneider NC, Leger AJ, O'Callaghan K, et al. Platelet matrix metalloprotease-1 mediates thrombogenesis by activating PAR1 at a cryptic ligand site. *Cell*. 2009;137(2):332-43.
12. Mastenbroek TG, Feijge MA, Kremers RM, van den Bosch MT, Swieringa F, De Groef L, et al. Platelet-Associated Matrix Metalloproteinases Regulate Thrombus Formation and Exert Local Collagenolytic Activity. *Arterioscler Thromb Vasc Biol*. 2015;35(12):2554-61.
13. Brinckerhoff CE, Rutter JL, Benbow U. Interstitial collagenases as markers of tumor progression. *Clin Cancer Res*. 2000;6(12):4823-30.
14. Nguyen CH, Senfter D, Basilio J, Holzner S, Stadler S, Krieger S, et al. NF-κB contributes to MMP1 expression in breast cancer spheroids causing paracrine PAR1 activation and disintegrations in the lymph endothelial barrier in vitro. *Oncotarget*. 2015;6(36):39262-75.
15. Boire A, Covic L, Agarwal A, Jacques S, Sherifi S, Kuliopulos A. PAR1 is a matrix metalloprotease-1 receptor that promotes invasion and tumorigenesis of breast cancer cells. *Cell*. 2005;120(3):303-13.

- 255 16. Arman M, Krauel K. Human platelet IgG Fc receptor FcγRIIA in immunity and  
256 thrombosis. *J Thromb Haemost.* 2015;13(6):893-908.
- 257 17. Thienel M, Müller-Reif JB, Zhang Z, Ehreiser V, Huth J, Shchurovska K, et al.  
258 Immobility-associated thromboprotection is conserved across mammalian species from bear  
259 to human. *Science.* 2023;380(6641):178-87.
- 260 18. Kaiser WJ, Holbrook LM, Tucker KL, Stanley RG, Gibbins JM. A functional  
261 proteomic method for the enrichment of peripheral membrane proteins reveals the collagen  
262 binding protein Hsp47 is exposed on the surface of activated human platelets. *J Proteome*  
263 *Res.* 2009;8(6):2903-14.
- 264 19. Sasikumar P, AlOuda KS, Kaiser WJ, Holbrook LM, Kriek N, Unsworth AJ, et al.  
265 The chaperone protein HSP47: a platelet collagen binding protein that contributes to  
266 thrombosis and hemostasis. *J Thromb Haemost.* 2018;16(5):946-59.
- 267 20. Giordano M, Croci DO, Rabinovich GA. Galectins in hematological malignancies.  
268 *Curr Opin Hematol.* 2013;20(4):327-35.
- 269 21. Li R, Colombo M, Wang G, Rodriguez-Romera A, O'Sullivan J, Clark S-A, et al. A  
270 pro-inflammatory stem cell niche drives myelofibrosis through a targetable galectin 1 axis.  
271 *bioRxiv.* 2023:2023.08.05.550630.
- 272 22. Diklić M, Mitrović-Ajtić O, Subotički T, Djikić D, Kovačić M, Bjelica S, et al. IL6  
273 inhibition of inflammatory S100A8/9 proteins is NF-κB mediated in essential  
274 thrombocythemia. *Cell Biochem Funct.* 2020;38(4):362-72.
- 275 23. Leimkühler NB, Costa IG, Schneider RK. From cell to cell: Identification of  
276 actionable targets in bone marrow fibrosis using single-cell technologies. *Exp Hematol.*  
277 2021;104:48-54.
- 278 24. Wang S, Song R, Wang Z, Jing Z, Wang S, Ma J. S100A8/A9 in Inflammation. *Front*  
279 *Immunol.* 2018;9:1298.
- 280 25. Wang YH, Chen YJ, Lai YH, Wang MC, Chen YY, Wu YY, et al. Mutation-Driven  
281 S100A8 Overexpression Confers Aberrant Phenotypes in Type 1 CALR-Mutated MPN. *Int J*  
282 *Mol Sci.* 2023;24(10).
- 283 26. Kovačić M, Mitrović-Ajtić O, Beleslin-Čokić B, Djikić D, Subotički T, Diklić M, et  
284 al. TLR4 and RAGE conversely mediate pro-inflammatory S100A8/9-mediated inhibition of  
285 proliferation-linked signaling in myeloproliferative neoplasms. *Cell Oncol (Dordr).*  
286 2018;41(5):541-53.
- 287 27. Lay AJ, Dupuy A, Hagimola L, Tieng J, Larance M, Zhang Y, et al. Endoplasmic  
288 reticulum protein 5 attenuates platelet endoplasmic reticulum stress and secretion in a mouse  
289 model. *Blood Adv.* 2023;7(9):1650-65.
- 290 28. Yang M, Chiu J, Scartelli C, Ponzar N, Patel S, Patel A, et al. Sulfenylation links  
291 oxidative stress to protein disulfide isomerase oxidase activity and thrombus formation. *J*  
292 *Thromb Haemost.* 2023;21(8):2137-50.
- 293 29. Fel A, Lewandowska AE, Petrides PE, Wiśniewski JR. Comparison of Proteome  
294 Composition of Serum Enriched in Extracellular Vesicles Isolated from Polycythemia Vera  
295 Patients and Healthy Controls. *Proteomes.* 2019;7(2).
- 296 30. Pan J, Lordier L, Meyran D, Rameau P, Lecluse Y, Kitchen-Goosen S, et al. The  
297 formin DIAPH1 (mDia1) regulates megakaryocyte proplatelet formation by remodeling the  
298 actin and microtubule cytoskeletons. *Blood.* 2014;124(26):3967-77.
- 299 31. Shirakawa R, Yoshioka A, Horiuchi H, Nishioka H, Tabuchi A, Kita T. Small  
300 GTPase Rab4 regulates Ca<sup>2+</sup>-induced alpha-granule secretion in platelets. *J Biol Chem.*  
301 2000;275(43):33844-9.
- 302 32. Yu S, Chen J, Quan M, Li L, Li Y, Gao Y. CD63 negatively regulates hepatocellular  
303 carcinoma development through suppression of inflammatory cytokine-induced STAT3  
304 activation. *J Cell Mol Med.* 2021;25(2):1024-34.

- 305 33. Alam S, Liu Q, Liu S, Liu Y, Zhang Y, Yang X, et al. Up-regulated cathepsin C  
306 induces macrophage M1 polarization through FAK-triggered p38 MAPK/NF- $\kappa$ B pathway.  
307 *Exp Cell Res*. 2019;382(2):111472.
- 308 34. Joshi S, Banerjee M, Zhang J, Kesaraju A, Pokrovskaya ID, Storrie B, et al.  
309 Alterations in platelet secretion differentially affect thrombosis and hemostasis. *Blood Adv*.  
310 2018;2(17):2187-98.
- 311 35. Li K, Tan G, Zhang X, Lu W, Ren J, Si Y, et al. EIF4G1 Is a Potential Prognostic  
312 Biomarker of Breast Cancer. *Biomolecules*. 2022;12(12).
- 313 36. Albakova Z, Armeev GA, Kanevskiy LM, Kovalenko EI, Sapozhnikov AM. HSP70  
314 Multi-Functionality in Cancer. *Cells*. 2020;9(3).
- 315 37. Trepel J, Mollapour M, Giaccone G, Neckers L. Targeting the dynamic HSP90  
316 complex in cancer. *Nat Rev Cancer*. 2010;10(8):537-49.
- 317 38. Zhang J, Li H, Liu Y, Zhao K, Wei S, Sugarman ET, et al. Targeting HSP90 as a  
318 Novel Therapy for Cancer: Mechanistic Insights and Translational Relevance. *Cells*.  
319 2022;11(18).
- 320 39. Bennett JA, Mastrangelo MA, Ture SK, Smith CO, Loelius SG, Berg RA, et al. The  
321 choline transporter Slc44a2 controls platelet activation and thrombosis by regulating  
322 mitochondrial function. *Nat Commun*. 2020;11(1):3479.
- 323 40. Germain M, Chasman DI, de Haan H, Tang W, Lindström S, Weng LC, et al. Meta-  
324 analysis of 65,734 individuals identifies TSPAN15 and SLC44A2 as two susceptibility loci  
325 for venous thromboembolism. *Am J Hum Genet*. 2015;96(4):532-42.
- 326 41. Ajanel A, Campbell RA, Denorme F. Platelet mitochondria: the mighty few. *Curr*  
327 *Opin Hematol*. 2023;30(5):167-74.
- 328 42. Aguilar A, Weber J, Boscher J, Freund M, Ziessel C, Eckly A, et al. Combined  
329 deficiency of RAB32 and RAB38 in the mouse mimics Hermansky-Pudlak syndrome and  
330 critically impairs thrombosis. *Blood Adv*. 2019;3(15):2368-80.
- 331 43. Osorio FG, Soria-Valles C, Santiago-Fernández O, Bernal T, Mittelbrunn M, Colado  
332 E, et al. Loss of the proteostasis factor AIRAPL causes myeloid transformation by  
333 deregulating IGF-1 signaling. *Nat Med*. 2016;22(1):91-6.
- 334 44. LaFave LM, Levine RL. Targeting a regulator of protein homeostasis in  
335 myeloproliferative neoplasms. *Nat Med*. 2016;22(1):20-1.
- 336 45. Jutzi JS, Marneth AE, Jiménez-Santos MJ, Hem J, Guerra-Moreno A, Rolles B, et al.  
337 CALR-mutated cells are vulnerable to combined inhibition of the proteasome and the  
338 endoplasmic reticulum stress response. *Leukemia*. 2023;37(2):359-69.
- 339
